# Supplementary material
Source: Frontiers journal article supplement (https://www.frontiersin.org/articles/543965)
Supplement: Data_Sheet_1.PDF [file Data_Sheet_1.PDF]

## SUPPLEMENTARY METHODS

### **Pull-down assays of Rho GTPase activity**

The production of Rho-binding domain (RBD-GST) fusion protein was performed as previously described (Griesi-Oliveira et al., 2018). To measure the endogenous RhoA activity, *in vitro* assays of pull-down were performed following a well-established protocol formerly described (Espinha et al., 2016). Briefly, cell lysates at desired conditions were incubated with RBD-GST fusion protein that specifically binds to RhoA-GTP (Rho active). Proteins were resolved on 13% SDS-PAGE and analyzed using a monoclonal anti-RhoA antibody (Table 1).

### **Analysis of actin filaments on stress fibers by immunofluorescence**

The analysis of actin filaments present on stress fibers was performed as previously described (Espinha et al., 2015). Briefly, cells were fixed with 3% formaldehyde for 10 min, permeabilized with 0.5% Triton X-100 for 5 min on ice and blocked with 3% BSA/10% FBS for 30 min. F-actin was stained with anti-Phalloidin antibody conjugated with Alexa Fluor 488 (Invitrogen, 1:500 in PBS) for 2 h in a humidified dark chamber and Vectashield with DAPI (VectorLab). Images were captured by confocal microscopy using a Zeiss LSM-510 microscope.

### **Scratch wound healing assays**

Two-dimension cell migration was measured using the wound healing assay as previously described (Ascer et al., 2015). Briefly, cells were plated at 100% confluence, subjected to radiation treatments and then the plates were diametrically scratched with a yellow pipette tip. Cell migration was evaluated by comparing the invasion of the wound area after 24h using an inverted Olympus microscope and Cell-F software (Olympus).

### **Autophagy analysis by checking the expression of LC3BI/II protein**

The analysis of cellular autophagy was performed by the immunodetection of the LC3BI/II marker by immunofluorescence and western blotting assays. For immunofluorescence, HeLa and RhoA-N19 cells were treated with UV-radiation and collected 48 h after. The first incubation was performed with the primary antibody anti-LC3BI/II (Invitrogen, L10382, 1:500 in PBS) for 1 h at room temperature. The second incubation was made with the secondary antibody anti-rabbit Alexa 488 and anti-Phalloidin Rod (Invitrogen), both diluted 1:500 in PBS, for 1 h at room temperature. Images were visualized and captured using a Zeiss LSM-510 confocal microscope. For western blotting the same cellular conditions used for the immunofluorescence analysis was performed and total proteins resolved in a SDS-PAGE, followed by incubating the membrane with the primary antibody anti-LC3BI/II diluted 1:1000 in TBS-T, for 18 h at 4°C. Next, following the incubation with secondary antibody anti-rabbit IRDye 680RD (LI-COR Biosciences) diluted 1:15000 for 1 h at room temperature, the membrane was scanned using an Odyssey infrared imaging system (Li-Cor). As positive control for both experiments, cells were treated with 50  $\mu$ M chloroquine for 16 h at 37°C.

## REFERENCES

- Ascer, L. G., Magalhaes, Y. T., Espinha, G., Osaki, J. H., Souza, R. C., and Forti, F. L. (2015). CDC42 Gtpase Activation Affects Hela Cell DNA Repair and Proliferation Following UV Radiation-Induced Genotoxic Stress. *J Cell Biochem* 116, 2086–2097. doi:10.1002/jcb.25166.
- Espinha, G., Osaki, J. H., Costa, E. T., and Forti, F. L. (2016). Inhibition of the RhoA GTPase Activity Increases Sensitivity of Melanoma Cells to UV Radiation Effects. *Oxid Med Cell Longev* 2016, 2696952. doi:10.1155/2016/2696952.
- Espinha, G., Osaki, J. H., Magalhaes, Y. T., and Forti, F. L. (2015). Rac1 GTPase-deficient HeLa cells present reduced DNA repair, proliferation, and survival under UV or gamma irradiation. *Mol Cell Biochem* 404, 281–297. doi:10.1007/s11010-015-2388-0.
- Griesi-Oliveira, K., Suzuki, A. M., Alves, A. Y., Mafra, A. C. C. N., Yamamoto, G. L., Ezquina, S., et al. (2018). Actin cytoskeleton dynamics in stem cells from autistic individuals. *Sci. Rep.* 8, 11138. doi:10.1038/s41598-018-29309-6.
